# Supplementary material for: Removal of Hexamethyldisiloxane via a Novel Hydrophobic (3–Aminopropyl)Trimethoxysilane-Modified Activated Porous Carbon
Source: MDPI journal article supplement (doi:10.3390/molecules28186493), 2023-09-07
Supplement: s1 [file s1]

## Supplementary information

# Removal of Hexamethyldisiloxane by a Novel Hydrophobic APTMS–Modified Activated Porous Carbon

Siqi Lv <sup>1</sup>, Yingrun Wang <sup>1</sup>, Yanhui Zheng <sup>1,2,\*</sup> and Zichuan Ma <sup>1,\*</sup>

<sup>1</sup> Hebei Key Laboratory of Inorganic Nano–Materials, College of Chemistry and Material Sciences, Hebei Normal University, Shijiazhuang 050024, China

<sup>2</sup> School of Chemical Engineering, Shijiazhuang University, Shijiazhuang 050035, China

**Table S1.** Different preparation methods, textural parameters, and performances of porous absorbent materials for siloxane removal

| Adsorbent           | Origin                                       | Modified method                   | $S_{\text{BET}}$ , $\text{m}^2 \text{g}^{-1}$ | $V_{\text{tot}}$ , $\text{cm}^3 \text{g}^{-1}$ | Adsorbed gas | $Q$ , $\text{mg g}^{-1}$ | Ref.      |
|---------------------|----------------------------------------------|-----------------------------------|-----------------------------------------------|------------------------------------------------|--------------|--------------------------|-----------|
| APC–4               | Coconut shells                               | NaOH                              | 2551                                          | 1.30                                           | L2           | 894.7                    | [14]      |
| AC–8                | Commercial                                   | /                                 | 1573                                          | 0.92                                           | D4           | 224.6                    | [17]      |
| AC2                 | Lignocellulosic waste                        | $\text{K}_2\text{CO}_3$           | 1668                                          | 0.70                                           | L2<br>D4     | 438.0<br>512.0           | [19]      |
| MMSG                | Silica gel                                   | PEI <sup>a</sup>                  | 539                                           | 0.73                                           | L2           | 367.1                    | [20]      |
| MFS2                | Silica gel                                   | MTS <sup>b</sup>                  | 1261                                          | 1.03                                           | L2           | 315.4                    | [21]      |
| UCT–15 <sup>c</sup> | Tetraethylorthosilicate and aluminum nitrate | /                                 | 533                                           | 0.26                                           | D4           | 105.0                    | [22]      |
| RPA                 | Silica gel                                   | PAA <sup>d</sup>                  | 120                                           | /                                              | D5           | 21.6                     | [23]      |
| rGOA–2              | IGGO <sup>e</sup>                            | CA <sup>f</sup>                   | 582                                           | 2.43                                           | L2           | 188.3                    | [15]      |
| U–rGOA              | IGGO <sup>e</sup>                            | Urea                              | 168                                           | 0.74                                           | L2           | 83.9                     | [24]      |
| APTMS@APC–0.125     | Coconut shells                               | $\text{H}_3\text{PO}_4$ and APTMS | 1274                                          | 0.88                                           | L2           | 380.4                    | This work |

<sup>a</sup> Polyethylene imine;

<sup>b</sup> Methyltrimethoxymethylsilane;

<sup>c</sup> Mesoporous aluminosilicate;

<sup>d</sup> Polyacrylic acid

<sup>e</sup> Industrial grade multilayer graphene oxide;

<sup>f</sup> Citric acid.

**Table S2.** The statistical parameters of curves between  $Q_{B, th} - CA$ ,  $Q_{B, th} - S_{BET}$ ,  $Q_{B, th} - V_{meso}$ , and  $Q_{B, th} - V_{tot}$  for the APTMS@APC-0.125

| Statistical parameters  |                | $Q_{B, th} - CA$ | $Q_{B, th} - S_{BET}$ | $Q_{B, th} - V_{meso}$ | $Q_{B, th} - V_{tot}$ |
|-------------------------|----------------|------------------|-----------------------|------------------------|-----------------------|
| Number of Points        |                | 6                | 6                     | 6                      | 6                     |
| Equation                |                | $y = a + bx$     |                       |                        |                       |
| Residual Sum of Squares |                | 178.4943         | 898.0011              | 1518.9473              | 1751.6294             |
| Standard deviation      |                | 5.9749           | 13.4015               | 17.4296                | 18.717                |
| <i>R</i> -Square        |                | 0.9880           | 0.9393                | 0.8974                 | 0.8817                |
| Intercept               | Value          | -10.0785         | -242.7953             | -103.0703              | -313.1645             |
|                         | Standard Error | 17.8034          | 70.3012               | 70.0219                | 114.1675              |
| Slope                   | Value          | 2.8772           | 0.4730                | 949.6968               | 761.1790              |
|                         | Standard Error | 0.1589           | 0.0601                | 160.5428               | 139.4050              |
